# Supplementary material for: Solid-State Structural Transformation in Zn(II) Metal–Organic Frameworks in a Single-Crystal-to-Single-Crystal Fashion
Source: MDPI journal article supplement (doi:10.3390/nano13162319), 2023-08-12
Supplement: s1 [file s1]

# **Supplementary Material**

## **for**

### **Solid-State Structural Transformation in Zn(II) Metal–Organic Frameworks in Single-Crystal-to-Single-Crystal Fashion**

**Jaewook An <sup>1</sup>, Jihye Oh <sup>1</sup>, Uma Kurakula <sup>2</sup>, Dong Hee Lee <sup>1</sup>, Aditya Choudhury<sup>2</sup>, Eunji Lee <sup>3</sup>, Raghavender Medishetty <sup>2,\*</sup> and In-Hyeok Park <sup>1,\*</sup>**

<sup>1</sup>Graduate School of Analytical Science and Technology (GRAST), Chungnam National University, Daejeon 34134, Republic of Korea

<sup>2</sup>Department of Chemistry, Indian Institute of Technology Bhilai, GEC Campus, Sejbahar, Raipur, Chhattisgarh, India

<sup>3</sup>Department of Chemistry, Gangneung-Wonju National University, Gangneung 25457, Republic of Korea

\* Correspondence: [raghavender@iitbhilai.ac.in](mailto:raghavender@iitbhilai.ac.in) (R.M.) and [ipark@cnu.ac.kr](mailto:ipark@cnu.ac.kr) (I.-H.P)

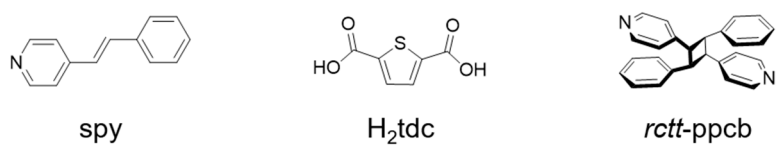

**Figure S1.** Chemical structures used in this work.

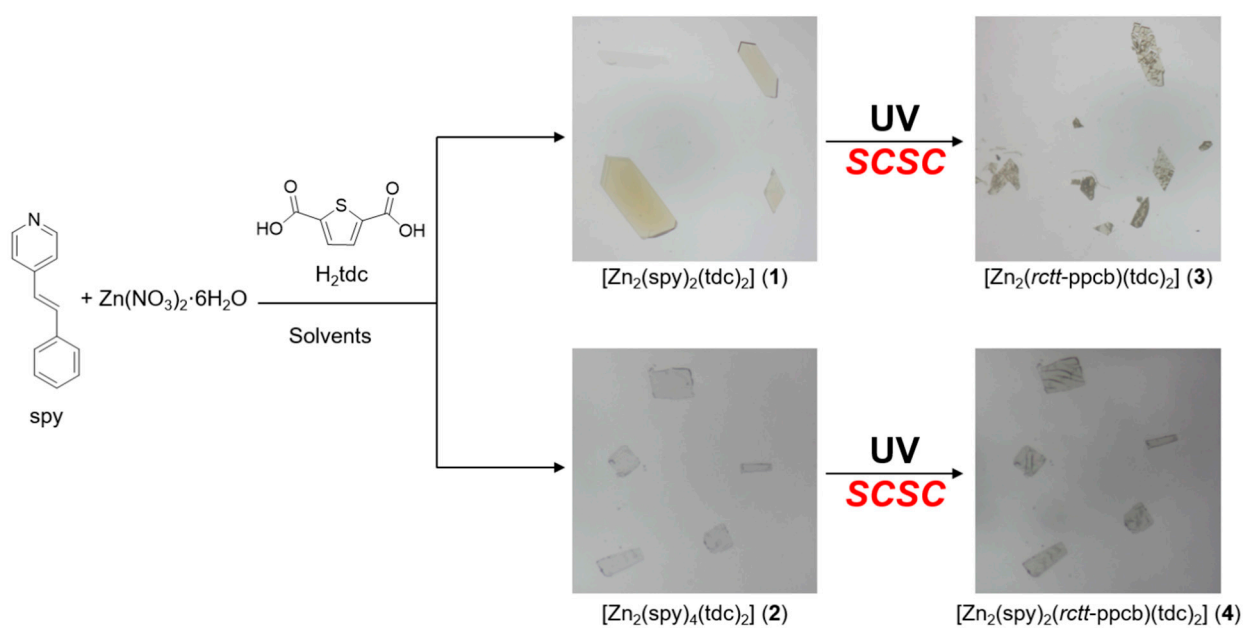

**Figure S2.** Synthetic scheme of preparation of 1-4.

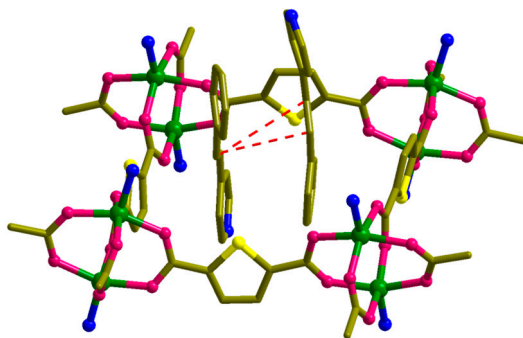

**Figure S3.** Alignment of spy ligands in the space of  $[\text{Zn}_8\text{tdc}_4]$  net in 1.



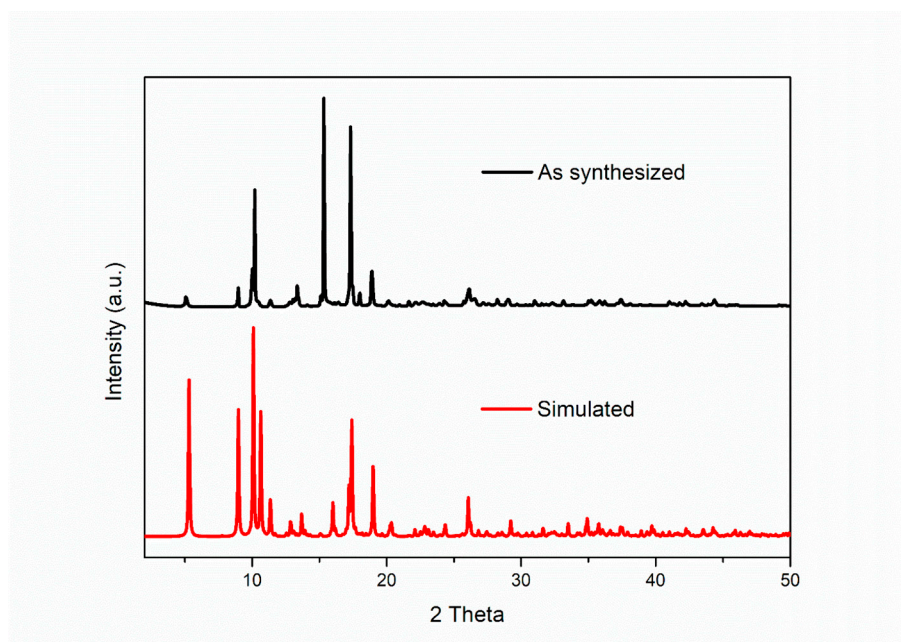

**Figure S6.** PXRD patterns for **2**: (top) as synthesized and (bottom) simulated from the single crystal X-ray data. The discrepancies in the intensities may be due to preferred orientations of the powder or partial removal of solvents during grinding.

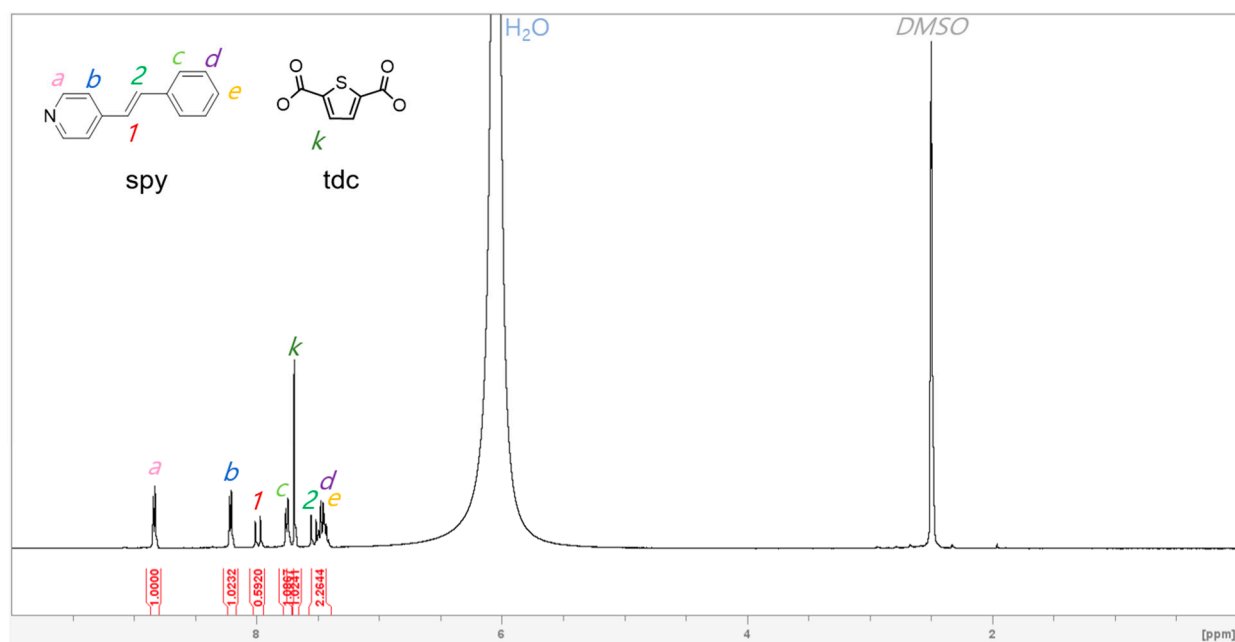

**Figure S7.**  $^1\text{H}$  NMR spectrum of **1**.

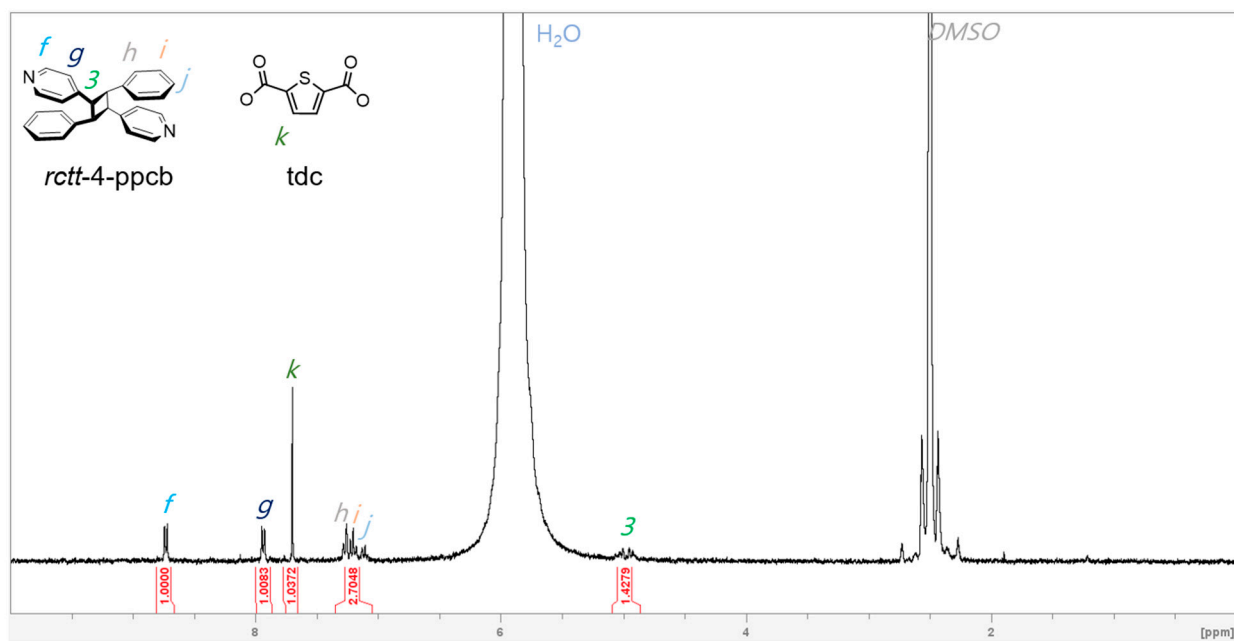

**Figure S8.**  $^1\text{H}$  NMR spectrum of **2**.

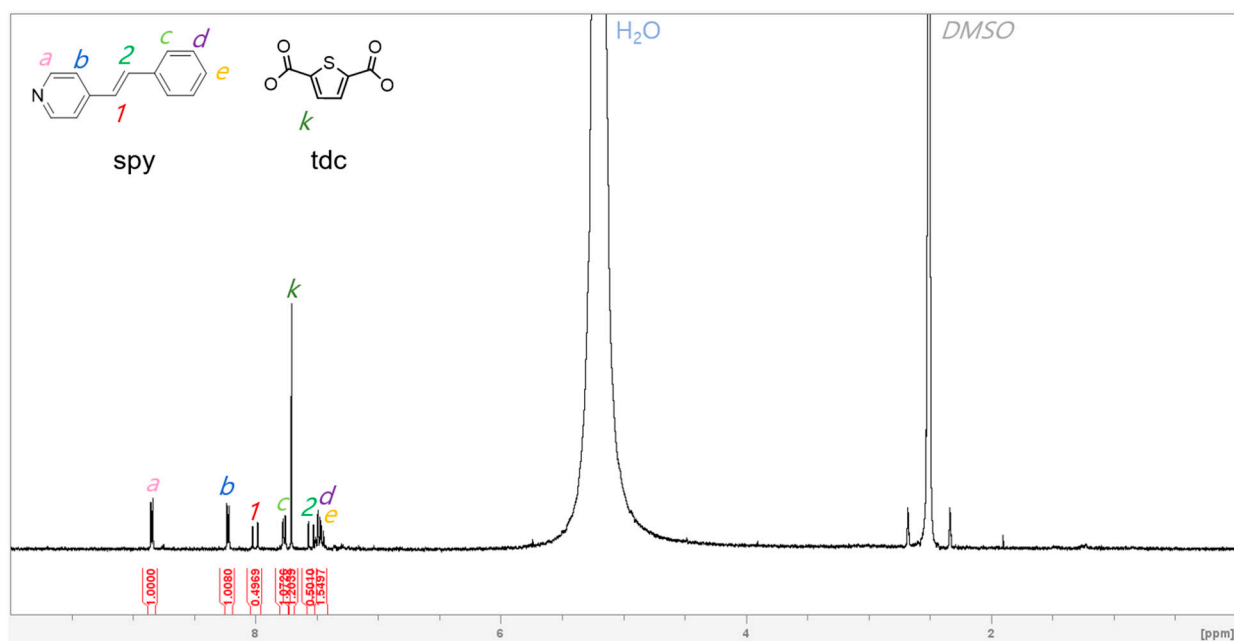

**Figure S9.**  $^1\text{H}$  NMR spectrum of **3**.

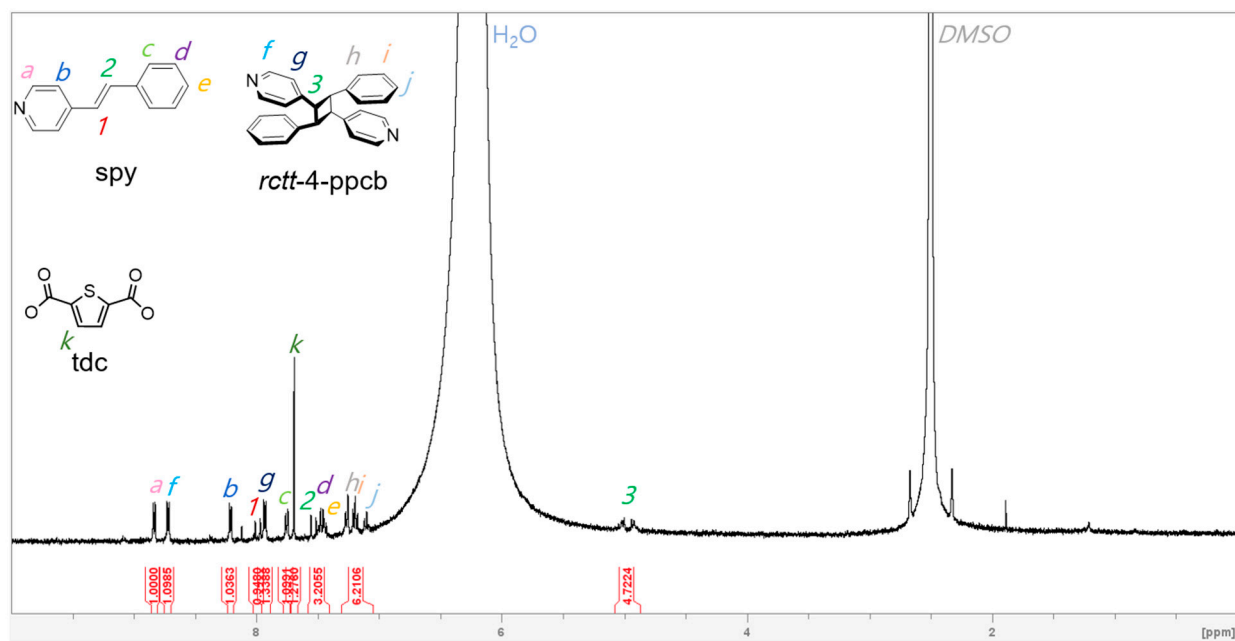

**Figure S10.** <sup>1</sup>H NMR spectrum of **4**.

**Table S1.** Selected bond lengths (Å) and bond Angles (°) for **1**<sup>a</sup>

|             |            |              |            |
|-------------|------------|--------------|------------|
| Zn1-Zn2     | 3.0186(16) | Zn1-O2       | 2.082(4)   |
| Zn1-O4A     | 2.037(4)   | Zn1-O6       | 2.029(3)   |
| Zn1-O8B     | 2.060(3)   | Zn1-N2       | 2.039(4)   |
| Zn2-O1      | 2.058(3)   | Zn2-O3A      | 2.053(3)   |
| Zn2-O5      | 2.044(3)   | Zn2-O7B      | 2.065(3)   |
| Zn2-N1      | 2.033(4)   | Zn2-Zn1-O2   | 76.57(10)  |
| Zn2-Zn1-O4A | 79.12(11)  | Zn2-Zn1-O6   | 77.90(10)  |
| Zn2-Zn1-O8B | 85.96(11)  | Zn2-Zn1-N2   | 173.88(12) |
| O2-Zn1-O4A  | 85.69(16)  | O2-Zn1- O6   | 88.41(16)  |
| O2-Zn1-O8B  | 162.53(15) | O2-Zn1-N2    | 97.68(15)  |
| O4A-Zn1-O6  | 157.02(14) | O4A-Zn1-O8B  | 90.69(15)  |
| O4A-Zn1-N2  | 102.77(16) | O6-Zn1-O8B   | 88.32(15)  |
| O6-Zn1-N2   | 100.02(15) | O8B-Zn1- N2  | 99.78(16)  |
| Zn1-Zn2-O1  | 82.12(10)  | Zn1-Zn2-O3A  | 78.80(11)  |
| Zn1-Zn2-O5  | 80.09(10)  | Zn1-Zn2- O7B | 71.66(11)  |
| Zn1-Zn2-N1  | 173.14(11) | O1-Zn2- O3A  | 88.25(15)  |
| O1-Zn2-O5   | 87.84(15)  | O1-Zn2-O7B   | 153.60(14) |
| O1-Zn2-N1   | 104.69(14) | O3A-Zn2-O5   | 158.87(14) |
| O3A-Zn2-O7B | 89.64(15)  | O3A-Zn2-N1   | 100.40(16) |
| O5-Zn2-O7B  | 84.72(16)  | O5-Zn2-N1    | 100.68(15) |
| O7B-Zn2-N1  | 101.57(15) |              |            |

<sup>a</sup>Symmetry operations: (A) -x+3/2,y+1/2,z; (B) -x+1/2,y+1/2,z

**Table S2.** Selected bond lengths (Å) and bond Angles (°) for **2<sup>a</sup>**

|             |           |             |           |
|-------------|-----------|-------------|-----------|
| Zn1-O1      | 1.999(11) | Zn1-O3A     | 1.992(11) |
| Zn1-O6      | 2.020(11) | Zn1-N1      | 2.116(16) |
| Zn1-N2      | 2.163(16) | Zn2-O2      | 2.014(10) |
| Zn2-O5      | 2.015(11) | Zn2-O9      | 1.980(11) |
| Zn2-N3      | 2.149(16) | Zn2-N4      | 2.135(16) |
| Zn3-O7      | 1.992(11) | Zn3-O11     | 2.004(11) |
| Zn3-O14     | 2.023(11) | Zn3-N5      | 2.115(16) |
| Zn3-N6      | 2.193(16) | Zn4-O12     | 2.030(11) |
| Zn4-O13     | 2.000(11) | Zn4-O17     | 1.992(11) |
| Zn4-N7      | 2.143(17) | Zn4-N8      | 2.119(16) |
| Zn5-O15     | 2.001(11) | Zn5-O19     | 1.998(11) |
| Zn5-O22     | 2.036(11) | Zn5-N9      | 2.120(16) |
| Zn5-N10     | 2.164(16) | Zn6-O20     | 2.025(10) |
| Zn6-O21     | 1.991(11) | Zn6-O27     | 2.021(11) |
| Zn6-N11     | 2.150(16) | Zn6-N12     | 2.100(16) |
| Zn7-O23     | 1.973(11) | Zn7-O25     | 2.008(11) |
| Zn7-O26B    | 2.025(11) | Zn7-N13     | 2.124(16) |
| Zn7-N14     | 2.189(16) | O1-Zn1-O3A  | 100.2(5)  |
| O1-Zn1-O6   | 113.6(5)  | O1-Zn1-N1   | 99.0(5)   |
| O1-Zn1-N2   | 91.0(5)   | O3A-Zn1-O6  | 146.1(5)  |
| O3A-Zn1-N1  | 88.8(6)   | O3A-Zn1-N2  | 88.0(5)   |
| O6-Zn1-N1   | 89.2(5)   | O6-Zn1-N2   | 88.2(5)   |
| N1-Zn1-N2   | 170.0(5)  | O2-Zn2-O5   | 112.9(4)  |
| O2-Zn2-O9   | 147.2(4)  | O2-Zn2-N3   | 88.3(5)   |
| O2-Zn2-N4   | 89.4(5)   | O5-Zn2-O9   | 99.6(5)   |
| O5-Zn2-N4   | 99.5(5)   | O5-Zn2-N3   | 90.4(5)   |
| O9-Zn2-N3   | 87.7(5)   | O9-Zn2-N4   | 88.9(5)   |
| N3-Zn2-N4   | 170.0(5)  | O7-Zn3-O11  | 100.3(4)  |
| O7-Zn3-O14  | 146.0(4)  | O7-Zn3-N5   | 89.2(5)   |
| O7-Zn3-N6   | 87.9(5)   | O11-Zn3-O14 | 113.4(5)  |
| O11-Zn3-N5  | 99.3(5)   | O11-Zn3-N6  | 89.7(5)   |
| O14-Zn3-N5  | 90.1(5)   | O14-Zn3-N6  | 87.5(5)   |
| N5-Zn3-N6   | 170.9(5)  | O12-Zn4-O13 | 114.4(5)  |
| O12-Zn4-O17 | 144.9(4)  | O12-Zn4-N7  | 86.8(5)   |



|              |          |              |          |
|--------------|----------|--------------|----------|
| O12-Zn4-N8   | 90.3(5)  | O13-Zn4-O17  | 100.3(5) |
| O13-Zn4-N7   | 90.7(5)  | O13-Zn4-N8   | 98.8(5)  |
| O17-Zn4-N7   | 87.8(5)  | O17-Zn4-N8   | 89.4(5)  |
| N7-Zn4- N8   | 170.4(5) | O15-Zn5-O19  | 100.6(5) |
| O15-Zn5-O22  | 145.0(5) | O15-Zn5-N9   | 89.6(6)  |
| O15-Zn5-N10  | 87.8(5)  | O19-Zn5-O22  | 113.9(5) |
| O19-Zn5-N9   | 99.5(5)  | O19-Zn5-N10  | 91.1(5)  |
| O22-Zn5-N9   | 90.0(5)  | O22-Zn5-N10  | 86.3(5)  |
| N9-Zn5-N10   | 169.3(5) | O20-Zn6-O21  | 115.0(5) |
| O20-Zn6-O27  | 144.0(4) | O20-Zn6-N11  | 87.3(5)  |
| O20-Zn6-N12  | 89.5(5)  | O21-Zn6-O27  | 100.8(5) |
| O21-Zn6-N12  | 98.9(5)  | O21-Zn6-N11  | 91.5(5)  |
| O27-Zn6-N11  | 87.9(5)  | O27-Zn6-N12  | 88.8(5)  |
| N11-Zn6-N12  | 169.5(5) | O23-Zn7-O25  | 100.6(4) |
| O23-Zn7-O26B | 145.9(5) | O23-Zn7-N13  | 89.2(5)  |
| O23-Zn7-N14  | 87.3(5)  | O25-Zn7-O26B | 113.1(5) |
| O25-Zn7-N13  | 100.1(5) | O26B-Zn7-N13 | 89.9(5)  |
| O26B-Zn7-N14 | 87.2(5)  | N13-Zn7-N14  | 169.1(5) |

<sup>a</sup>Symmetry operations: (A) -x,-y+3,-z+1; (B) -x+1,-y,-z

**Table S3.** Selected bond lengths (Å) and bond Angles (°) for **3<sup>a</sup>**

|             |            |              |            |
|-------------|------------|--------------|------------|
| Zn1-Zn2     | 3.0107(7)  | Zn1-O1       | 2.0311(17) |
| Zn1-O3A     | 2.0274(16) | Zn1-O5       | 2.0438(17) |
| Zn1-O7B     | 2.0478(19) | Zn1-N1       | 2.057(5)   |
| Zn1-N1X     | 2.040(6)   | Zn2-O2       | 2.0676(16) |
| Zn2-O4A     | 2.0362(16) | Zn2-O6       | 2.0446(16) |
| Zn2-O8B     | 2.0544(17) | Zn2-N2C      | 2.036(6)   |
| Zn2-N2XC    | 2.035(8)   | Zn2-Zn1-O1   | 89.81(5)   |
| Zn2-Zn1-O3A | 78.82(5)   | Zn2-Zn1-O5   | 77.25(5)   |
| Zn2-Zn1-O7B | 72.75(6)   | Zn2-Zn1-N1   | 166.24(16) |
| Zn2-Zn1-N1X | 158.68(18) | O1-Zn1-O3A   | 88.99(8)   |
| O1-Zn1-O5   | 87.81(8)   | O1-Zn1-O7B   | 162.51(7)  |
| O1-Zn1-N1   | 96.92(15)  | O1-Zn1-N1X   | 110.61(18) |
| O3A-Zn1-O5  | 155.86(7)  | O3A-Zn1-O7B  | 88.96(9)   |
| O3A-Zn1-N1  | 113.16(17) | O3A-Zn1-N1X  | 106.65(19) |
| O5-Zn1-O7B  | 86.98(9)   | O5-Zn1-N1    | 90.98(16)  |
| O5-Zn1-N1X  | 96.85(19)  | O7B-Zn1-N1   | 99.85(15)  |
| Zn1-Zn2-O2  | 68.06(5)   | Zn1-Zn2-O4A  | 79.32(5)   |
| Zn1-Zn2-O6  | 80.16(4)   | Zn1-Zn2-O8B  | 84.94(5)   |
| Zn1-Zn2-N2C | 166.25(17) | Zn1-Zn2-N2XC | 167.2(2)   |
| O2-Zn2-O4A  | 84.01(7)   | O2-Zn2-O6    | 90.56(7)   |
| O2-Zn2-O8B  | 152.89(7)  | O2-Zn2-N2C   | 100.06(17) |
| O2-Zn2-N2XC | 99.2(2)    | O4A-Zn2-O6   | 159.34(6)  |
| O4A-Zn2-O8B | 88.79(7)   | O4A-Zn2-N2C  | 107.09(18) |
| O6-Zn2-O8B  | 87.04(7)   | O6-Zn2-N2C   | 93.47(18)  |
| O6-Zn2-N2XC | 100.4(2)   | O8B-Zn2-N2C  | 107.03(17) |

<sup>a</sup>Symmetry operations: (A) -x+3/2,y+1/2,z; (B) -x+1/2,y+1/2,z; (C) x,-y+1/2,z-1/2

**Table S4.** Selected bond lengths (Å) and bond Angles (°) for **4<sup>a</sup>**

|            |            |             |            |
|------------|------------|-------------|------------|
| Zn1-O1     | 1.9847(13) | Zn1-O3A     | 2.0169(16) |
| Zn1-O4B    | 2.0250(14) | Zn1-N1      | 2.1672(18) |
| Zn1-N2     | 2.1226(17) | O1-Zn1-O3A  | 97.58(7)   |
| O1-Zn1-O4B | 148.17(7)  | O1-Zn1-N1   | 88.44(7)   |
| O1-Zn1-N2  | 90.14(7)   | O3A-Zn1-O4B | 113.94(7)  |
| O3A-Zn1-N1 | 91.27(7)   | O3A-Zn1-N2  | 97.70(7)   |
| O4B-Zn1-N1 | 86.67(7)   | O4B-Zn1-N2  | 89.88(7)   |
| Zn2-O4X    | 2.300(10)  | Zn2-O4XA    | 2.300(10)  |
| Zn2-O6     | 2.306(7)   | Zn2-O6A     | 2.306(7)   |
| N1-Zn1-N2  | 171.02(6)  |             |            |

<sup>a</sup>Symmetry operations: (A) -x,-y+1,-z+1; (B) x+1, y, z

**Table S5.** Weighting scheme and the individual weight coefficients for **1-4**.

|          |                   |                                                                     |
|----------|-------------------|---------------------------------------------------------------------|
| <b>1</b> | Weighting scheme  | calculated                                                          |
|          | Weighting details | 'w=1/[ $s^2(Fo^2)+(0.1564P)^2$ ] where $P=(Fo^2+2Fc^2)/3$ '         |
| <b>2</b> | Weighting scheme  | calculated                                                          |
|          | Weighting details | 'w=1/[ $s^2(Fo^2)+(0.0114P)^2+0.2454P$ ] where $P=(Fo^2+2Fc^2)/3$ ' |
| <b>3</b> | Weighting scheme  | calculated                                                          |
|          | Weighting details | 'w=1/[ $s^2(Fo^2)+(0.0468P)^2+9.5189P$ ] where $P=(Fo^2+2Fc^2)/3$ ' |
| <b>4</b> | Weighting scheme  | calculated                                                          |
|          | Weighting details | 'w=1/[ $s^2(Fo^2)+(0.0599P)^2+0.2107P$ ] where $P=(Fo^2+2Fc^2)/3$ ' |
